# Supplementary material for: Rescue of Low-Yield DNA Samples for Next-Generation Sequencing Using Vacuum Centrifugal Concentration in a Clinical Workflow
Source: MDPI journal article supplement (doi:10.3390/reports6020023), 2023-05-23
Supplement: s1 [file s1]

## 7. Supplementary

**Supplementary Table 1 (S1): Sample concentration, sample volume, and vacuum centrifugation time for Batch 1.**

| Concentration<br>(ng/ $\mu$ L) | Volume<br>( $\mu$ L) | Time<br>(minutes) |
|--------------------------------|----------------------|-------------------|
| 0.746 (Batch)                  | 55.0                 | 0                 |
| 0.996                          | 47.0                 | 5                 |
| 0.980                          | 47.0                 | 5                 |
| 1.056                          | 44.5                 | 5                 |
| 1.040                          | 46.0                 | 5                 |
| 1.088                          | 40.5                 | 10                |
| 1.174                          | 39.0                 | 10                |
| 1.162                          | 39.5                 | 10                |
| 1.118                          | 40.5                 | 10                |
| 1.296                          | 32.5                 | 15                |
| 1.272                          | 34.5                 | 15                |
| 1.302                          | 32.5                 | 15                |
| 1.284                          | 34.0                 | 15                |
| 1.544                          | 27.0                 | 20                |
| 1.550                          | 26.5                 | 20                |
| 1.500                          | 27.0                 | 20                |
| 1.488                          | 28.0                 | 20                |
| 1.542                          | 24.5                 | 25                |
| 1.558                          | 24.5                 | 25                |
| 1.550                          | 24.5                 | 25                |
| 1.538                          | 26.0                 | 25                |
| 1.734                          | 17.0                 | 30                |
| 1.716                          | 18.0                 | 30                |
| 1.780                          | 16.5                 | 30                |
| 1.758                          | 17.0                 | 30                |

**Supplementary Table 2 (S2): Sample concentration, sample volume, and vacuum centrifugation time for Batch 2.**

| Concentration<br>(ng/ $\mu$ L) | Volume<br>( $\mu$ L) | Time<br>(minutes) |
|--------------------------------|----------------------|-------------------|
| 0.170 (Batch)                  | 55.0                 | 0                 |
| 0.271                          | 42.0                 | 10                |
| 0.286                          | 40.0                 | 10                |
| 0.239                          | 40.5                 | 10                |

|       |      |    |
|-------|------|----|
| 0.254 | 41.5 | 10 |
| 0.326 | 30.0 | 20 |
| 0.356 | 29.5 | 20 |
| 0.342 | 28.0 | 20 |
| 0.348 | 30.5 | 20 |
| 0.518 | 22.5 | 30 |
| 0.498 | 19.5 | 30 |
| 0.510 | 19.0 | 30 |
| 0.620 | 21.0 | 30 |
| 1.122 | 11.5 | 40 |
| 1.056 | 10.0 | 40 |
| 1.000 | 10.5 | 40 |
| 0.884 | 11.0 | 40 |

**Supplementary Table 3 (S3): Sample concentration pre- and post-vacuum centrifugation for verification samples for the modeled linear relationship.**

| Pre-vacuum centrifugation (ng/ $\mu$ L) | Predicted concentration (ng/ $\mu$ L) | Post-vacuum centrifugation (ng/ $\mu$ L) | Time (minutes) |
|-----------------------------------------|---------------------------------------|------------------------------------------|----------------|
| 1.212                                   | 1.736                                 | 1.876                                    | 20             |
| 0.808                                   | 1.332                                 | 1.352                                    | 20             |
| 0.550                                   | 1.074                                 | 1.074                                    | 20             |
| 0.294                                   | 0.818                                 | 0.534                                    | 20             |

**Supplementary Table 4 (S4): Sample volume pre- and post-vacuum centrifugation for verification samples for the modeled linear relationship.**

| Pre-vacuum volume ( $\mu$ L) | Predicted volume ( $\mu$ L) | Post-vacuum volume ( $\mu$ L) | Time (minutes) |
|------------------------------|-----------------------------|-------------------------------|----------------|
| 55                           | 33.065                      | 32                            | 20             |
| 55                           | 33.065                      | 32                            | 20             |
| 55                           | 33.065                      | 32.5                          | 20             |
| 55                           | 33.065                      | 32.5                          | 20             |

**Supplementary Table 5 (S5): Sample concentration pre- and post-vacuum centrifugation for verification samples for a linear relationship.**

| Sample ID | Pre-vacuum centrifugation (ng/ $\mu$ L) | Post-vacuum centrifugation (ng/ $\mu$ L) | Time (minutes) |
|-----------|-----------------------------------------|------------------------------------------|----------------|
| S1.1      | 0.752                                   | 1.680                                    | 30             |
| S2.1      | 0.728                                   | 1.300                                    | 30             |

|      |       |       |    |
|------|-------|-------|----|
| S3.1 | 0.728 | 1.720 | 30 |
| S1.2 | 0.508 | 1.480 | 35 |
| S2.2 | 0.468 | 1.320 | 35 |
| S3.2 | 0.450 | 1.240 | 35 |
| S1.3 | 0.180 | 1.032 | 35 |
| S2.3 | 0.198 | 1.112 | 35 |
| S3.3 | 0.176 | 0.976 | 35 |
| S4.1 | 0.534 | 1.890 | 35 |
| S5.1 | 0.362 | 1.360 | 35 |

**Supplementary Table 6 (S6): Overview of identified variants including locus, coverage, and allele frequency. Coverage is put to the upper limit of 2000; thus, coverage may be higher.**

| Sample | Locus          | Genotype  | Genes  | Coverage | Allele Frequency % | concentration |
|--------|----------------|-----------|--------|----------|--------------------|---------------|
| S1.0   | chr7:55259485  | C/T       | EGFR   | 2000     | 49.00              | 10.0          |
| S1.0   | chr12:25398284 | CC/CA     | KRAS   | 1991     | 38.67              | 10.0          |
| S1.1   | chr7:55259485  | C/T       | EGFR   | 2000     | 51.70              | 0.20          |
| S1.1   | chr12:25398284 | CC/CA     | KRAS   | 1997     | 40.61              | 0.20          |
| S1.2   | chr12:25398284 | CC/CA     | KRAS   | 1996     | 38.48              | 0.50          |
| S1.2   | chr7:55259485  | C/T       | EGFR   | 2000     | 48.55              | 0.50          |
| S1.3   | chr12:25398284 | CC/CA     | KRAS   | 1999     | 37.97              | 0.75          |
| S1.3   | chr7:55259485  | C/T       | EGFR   | 2000     | 51.30              | 0.75          |
| S2.0   |                |           |        |          |                    | 10.0          |
| S2.1   |                |           |        |          |                    | 0.20          |
| S2.2   |                |           |        |          |                    | 0.50          |
| S2.3   |                |           |        |          |                    | 0.75          |
| S3.0   | chr7:140453133 | TTCA/TTCT | BRAF   | 1982     | 5.85               | 10.0          |
| S3.0   | chr3:178936091 | G/A       | PIK3CA | 2000     | 5.00               | 10.0          |
| S3.1   | chr7:140453133 | TTCA/TTCT | BRAF   | 1984     | 4.44               | 0.20          |
| S3.1   | chr3:178936091 | G/A       | PIK3CA | 2000     | 5.30               | 0.20          |

|      |                |           |        |      |       |      |
|------|----------------|-----------|--------|------|-------|------|
| S3.2 | chr7:140453133 | TTCA/TTCT | BRAF   | 1993 | 4.87  | 0.50 |
| S3.2 | chr3:178936091 | G/A       | PIK3CA | 1999 | 5.10  | 0.50 |
| S3.3 | chr7:140453133 | TTCA/TTCT | BRAF   | 1987 | 4.73  | 0.75 |
| S3.3 | chr3:178936091 | G/A       | PIK3CA | 2000 | 5.30  | 0.75 |
| S4.0 | chr17:7578221  | TTC/T     | TP53   | 1976 | 29.5  | 1.4  |
| S4.1 | chr17:7578221  | TTC/T     | TP53   | 2815 | 25.12 | 0.36 |
| S5.0 | chr13:32913147 | G/A       | BRCA2  | 1997 | 12.42 | 3.96 |
| S5.0 | chr17:7577121  | G/A       | TP53   | 2000 | 27.15 | 3.96 |
| S5.0 | chr16:3832688  | G/C       | CREBBP | 1987 | 16.41 | 3.96 |
| S5.0 | chr13:32914926 | A/G       | BRCA2  | 1995 | 14.19 | 3.96 |
| S5.0 | chr13:32913171 | G/C       | BRCA2  | 1993 | 14.6  | 3.96 |
| S5.0 | chr9:139438473 | C/G       | NOTCH1 | 1972 | 51.52 | 3.96 |
| S5.0 | chr9:98238313  | C/T       | PTCH1  | 1032 | 34.3  | 3.96 |
| S5.0 | chr2:212566773 | G/T       | ERBB4  | 1997 | 12.17 | 3.96 |
| S5.0 | chr2:16082387  | C/A       | MYCN   | 810  | 13.7  | 3.96 |
| S5.0 | chr2:16082383  | G/C       | MYCN   | 812  | 13.67 | 3.96 |
| S5.1 | chr2:212566773 | G/T       | ERBB4  | 2000 | 5.2   | 0.53 |
| S5.1 | chr9:98238313  | C/T       | PTCH1  | 469  | 18.76 | 0.53 |
| S5.1 | chr9:139438473 | C/G       | NOTCH1 | 935  | 34.12 | 0.53 |
| S5.1 | chr13:32913147 | G/A       | BRCA2  | 2000 | 3.9   | 0.53 |
| S5.1 | chr13:32913171 | G/C       | BRCA2  | 2000 | 4.06  | 0.53 |
| S5.1 | chr13:32914926 | A/G       | BRCA2  | 2000 | 3.72  | 0.53 |
| S5.1 | chr16:3832688  | G/C       | CREBBP | 2000 | 7.28  | 0.53 |
| S5.1 | chr17:7577121  | G/A       | TP53   | 2000 | 11.55 | 0.53 |
| S5.1 | chr2:16082383  | G/C       | MYCN   | 329  | 6.38  | 0.53 |
| S5.1 | chr2:16082387  | C/A       | MYCN   | 329  | 6.38  | 0.53 |
